# Supplementary material for: Reactivity of nanoceria particles exposed to biologically relevant catechol-containing molecules
Source: Royal Society of Chemistry journal article supplement (doi:10.1039/c6ra07279h), 2016-01-01
Supplement: c6ra07279h1.pdf [file c6ra07279h1.pdf]

## Supplementary information

### Reactivity of nanoceria particles exposed to biologically relevant catechol-containing molecules

Gonca Bülbül, Akhtar Hayat, Xiaobo Liu and Silvana Andreescu

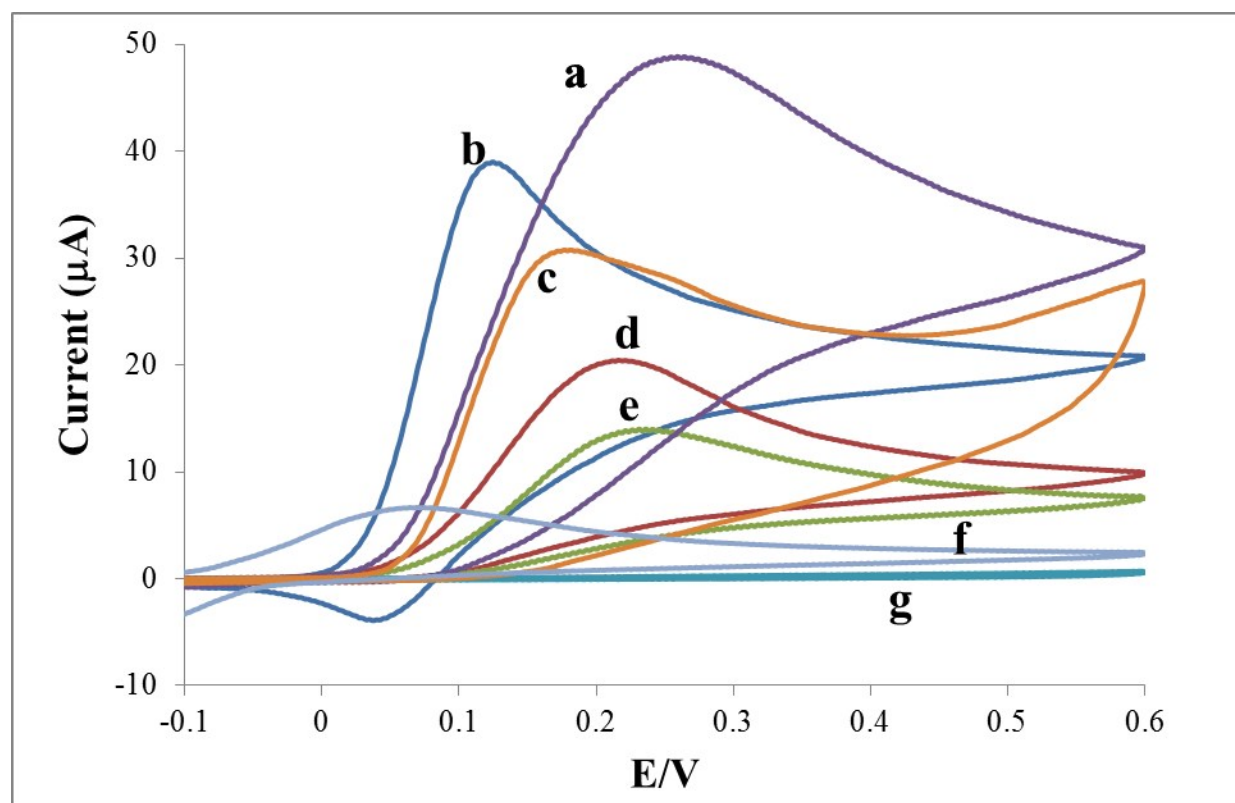

**Figure S1.** Electrochemical behavior of the representative molecules (1.5 mM) tested in this work, recorded using screen printed electrodes: a) norepinephrine, b) dopamine, c) serotonin, d) epinephrine, e) L-DOPA, f) DOPAC and g) phenylalanine.

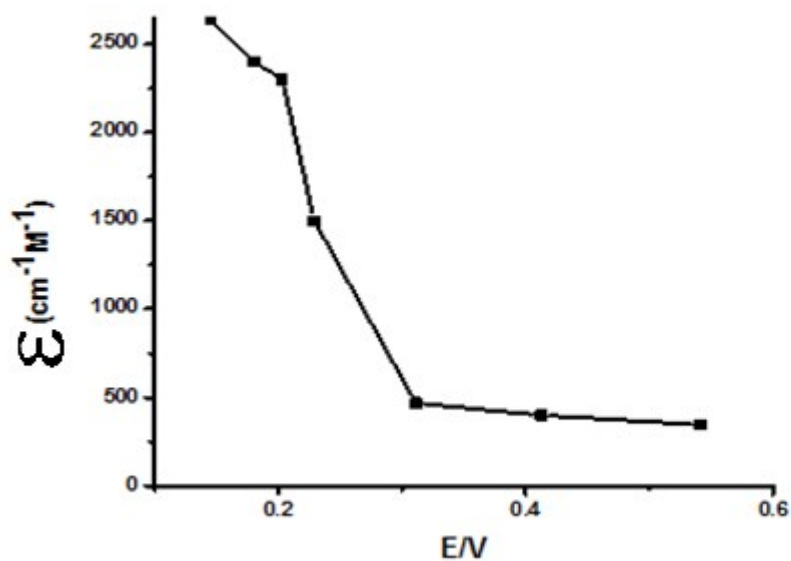

**Figure S2.** Correlation of the extinction coefficient values of catecholic molecules exposed to nanoceria particles (e.g. catechol-nanoceria complexes) versus the oxidation potential ( $E_{\text{oxi}}$ ) of these molecules, from low to high  $E_{\text{oxi}}$ : catechol, ascorbic acid, 1-naphthol, hydroquinone, bisphenol A, phenol, ochratoxin A in that order.

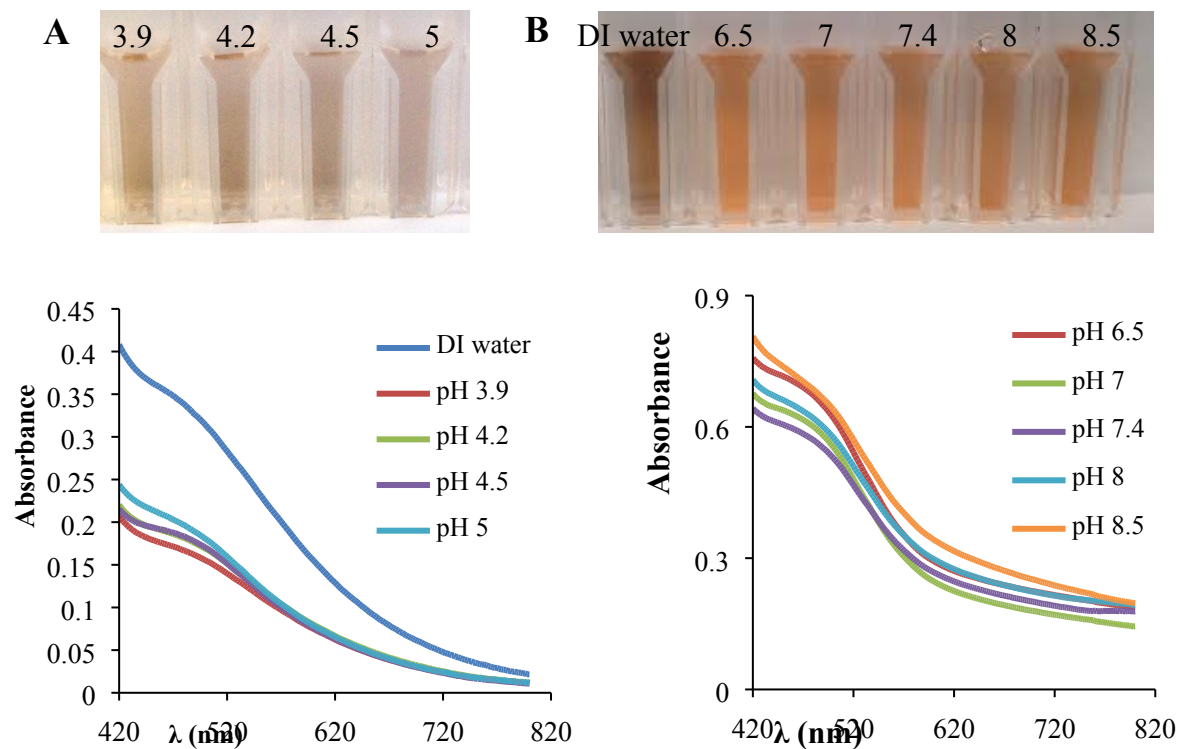

**Figure S3.** Interaction of nanoceria with L-dopa (0.1 mM) at varying pH values in A) acetate and B) phosphate buffers.

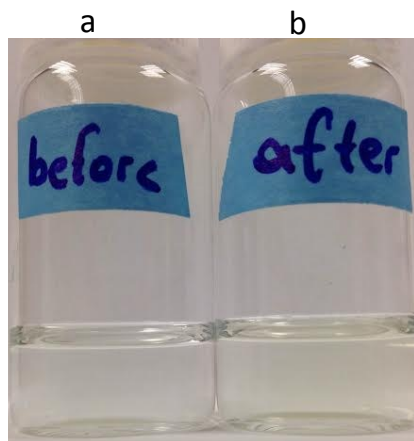

**Figure S4.** Interaction of nanoceria (5 mg/mL) with benzoquinone (0.5 mM); a) free benzoquinone and b) benzoquinone after incubation with particles.

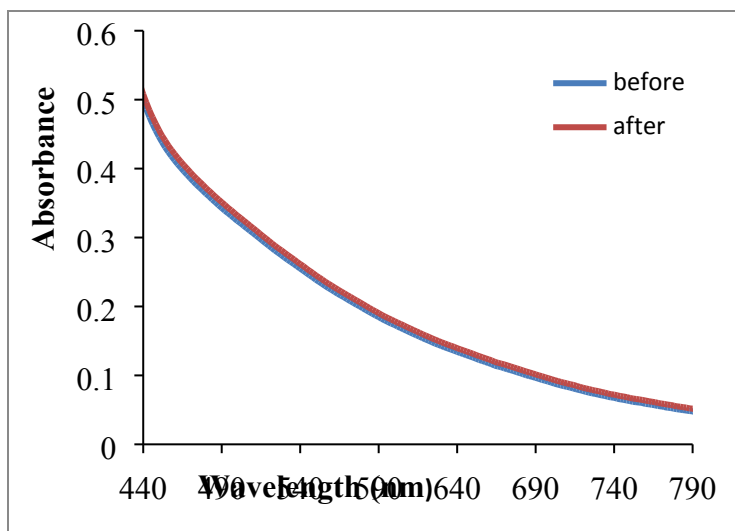

**Figure S5.** Absorption spectra of L-DOPA (0.1 mM) in the presence of nanoceria (5 mg/mL) before and after application of electrochemical potential.

**Table S1.** Summary of the chemical structures and the main characteristics of molecules from the catechol family and related aromatic compounds studied.

| Molecule name/ Chemical structure                                                                    | Extinction Coefficient of Complex (cm <sup>-1</sup> M <sup>-1</sup> ) | Electrochemical stability | Redox potential | Complex Formation/ Adsorption |
|------------------------------------------------------------------------------------------------------|-----------------------------------------------------------------------|---------------------------|-----------------|-------------------------------|
| Hydroquinone<br>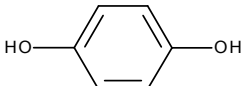    | 1500                                                                  | Active                    | 0.229V          | Complex Formation             |
| Catechol<br>        | 2638.9                                                                | Active                    | 0.145V          | Complex Formation             |
| Phenol<br>         | 400                                                                   | Active                    | 0.412V          | Complex Formation             |
| 1-naphthol<br>    | 2302.5                                                                | Active                    | 0.203V          | Complex Formation             |
| Ascorbic acid<br> | 2400                                                                  | Active                    | 0.180V          | Complex Formation             |
| Bisphenol A<br>   | 468.1                                                                 | Active                    | 0.311V          | Complex Formation             |

|                                                                                                                                                             |       |          |        |                   |
|-------------------------------------------------------------------------------------------------------------------------------------------------------------|-------|----------|--------|-------------------|
| <p style="text-align: center;"><b>Ochratoxin A</b></p> 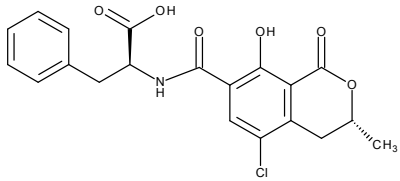                    | 346.1 | Active   | 0.541V | Complex Formation |
| <p style="text-align: center;"><b>Okadaic acid</b></p>                     | N/A   | Inactive | N/A    | Adsorption        |
| <p style="text-align: center;"><b><i>p</i>-nitrophenyl phosphate</b></p>  | N/A   | Inactive | N/A    | Adsorption        |
| <p style="text-align: center;"><b>1-naphthylphosphate</b></p>            | N/A   | Inactive | N/A    | Adsorption        |
| <p style="text-align: center;"><b>Ascorbic-2-phosphate</b></p>           | N/A   | Inactive | N/A    | Adsorption        |
